# Supplementary material for: Odour dialects among wild mammals
Source: PubMed Central journal article supplement (PMC5648788; doi:10.1038/s41598-017-12706-8), 2017-10-19
Supplement: 41598_2017_12706_MOESM1_ESM.pdf [file 41598_2017_12706_MOESM1_ESM.pdf]

## Title: Odour dialects among wild mammals

Authors: Kean, E.F., Bruford, M.W., Russo, I.M., Müller, C.T., Chadwick, E.A.

Supplementary Table S1. Number of otters from four genetic subpopulations sampled for anal gland odour analysis

|                    | Female |           |          | Male  |           |          | Total |
|--------------------|--------|-----------|----------|-------|-----------|----------|-------|
|                    | Adult  | Sub-adult | Juvenile | Adult | Sub-adult | Juvenile |       |
| Central England    | 12     | 8         |          | 6     | 4         | 1        | 31    |
| North England      | 15     | 5         |          | 4     | 7         | 4        | 35    |
| South-west England | 5      | 1         | 1        |       |           |          | 7     |
| Wales & Borders    | 17     | 7         | 6        | 7     | 8         | 4        | 49    |
| <b>Total</b>       | 49     | 21        | 7        | 17    | 19        | 9        | 122   |
